# Supplementary material for: Impact of the B Cell Growth Factor APRIL on the Qualitative and Immunological Characteristics of Atherosclerotic Plaques
Source: PubMed Central journal article supplement (PMC5098816; doi:10.1371/journal.pone.0164690), 2016-11-07
Supplement: pone.0164690.s005.pdf [file pone.0164690.s005.pdf]

**S1 Table.** Primer sequences and TaqMan probes.

| Gene               | Forward primer sequence     | Reverse primer sequence        |
|--------------------|-----------------------------|--------------------------------|
| Rplp0              | 5'-GGACCCGAGAAGACCTCCTT-3'  | 5'-GCACATCACTCAGAATTTCAATGG-3' |
| CD19               | 5'-AGGATGATGGACTTCCTGAGC-3' | 5'-ATGACTGGGACCGGACTGAA-3'     |
| APRIL <sup>a</sup> | Hs00182565_m1               |                                |
| HPRT <sup>a</sup>  | Mm00446968_m1               |                                |

<sup>a</sup> indicates TaqMan Probes
